# Supplementary material
Source: MDPI journal article supplement (https://www.mdpi.com/2227-9717/7/5/291)
Supplement: s1 [file s1]

## Supplementary File

### *Western Blot Analysis*

12.5%. SDS-PAGE was performed according to the method described by Laemmli (1970) [1]. In brief, sample buffer for reducing conditions was 60 mM Tris-HCl pH 6.8, 2% SDS, 5%  $\beta$ -mercaptoethanol ( $\beta$ -ME), 10% glycerol, and 0.01% bromophenol blue. For non-reducing conditions,  $\beta$ -ME was excluded from the sample buffer described above. The protein samples were mixed with 5×sample buffer and incubated for 1 h at room temperature. For heat-denaturation, samples were heated at 95 °C for 10 min unless indicated. For Western blot analysis, proteins separated by SDS-PAGE were electroblotted onto a PVDF (polyvinylidene difluoride) membrane (Millipore, Massachusetts, USA). The resulting membrane was blocked with 3% skim milk in Tris-buffered saline (TBS-T; 100 mM Tris, 150 mM NaCl, pH 7.4, and 0.1% Tween 20) at room temperature for 1 h and then incubated with 1:1000 diluted adiponectin antibodies in TBS-T containing 3% skim milk at 4 °C overnight. Unbound antibodies were removed by three 5-min washes in TBS-T at room temperature with gentle shaking. After washing, the membrane was incubated with horseradish peroxidase (HRP)-conjugated secondary antibody (1:2000) for 1 h at room temperature and then washed thoroughly. Detections used the chemiluminescent method with ECL Western blotting detection reagent (Amersham Biosciences, Connecticut, USA) or the colorimetric method with the CN/DAB Substrate Kit (Thermo Scientific) following the protocol provided by the manufacturer. For quantification purposes, the stained membranes were scanned with a flatbed scanner (Epson Perfection V750 Pro), which converted the image to a graphic picture file. The digitized image stored in the file was then analyzed by image analysis software (VisionWorksLS software, Ultra-Violet Products Ltd.).

### *Preparation of anti-ADN Antibody*

The procedure of anti-ADN antibody was modified by Hu *et. al.* (2003) [2]. In brief, the expression vector was pET30 vector (Novagen, Darmstadt, Germany). Porcine ADN (18-244, without the secretory leader peptide sequence) encoding residues DNA constructs were transformed into BL21 (DE3) *E. coli* (Novagen, Darmstadt, Germany). After optimization of the expression conditions, we could not make the ADN recombinant protein to be expressed in a soluble form. Inclusion bodies were resuspended in lysis buffer (20 mM Tris, 500 mM NaCl, 8 M urea, 5 mM  $\beta$ -mercaptoethanol, pH 8), incubated for 1hr at RT and centrifuged at 18,000 rpm. The solubilized protein was refolded in the presence of 200 volumes of 2 mol l<sup>-1</sup> urea, 20 mmol l<sup>-1</sup> Tris-HCl (pH 8.0) for 3 days at 4°C. To produce porcine ADN monoclonal antibody, male BALB/cJ mice were purchased from the Animal Center of National Taiwan University. Animals were housed with an inverse 12 hours day-night cycle with lights on at 6:00 am in a temperature (25 ± 1 °C) and humidity (60 ± 5%) controlled room with food and water provided *ad libitum*. In brief, we injected the mice with total 350  $\mu$ g porcine ADN for 4 times in 2 months to immunization of mice, according to the protocol of the reference, and then the antiserum was separated [2]. All animal experiments were performed according to regulations approved by the Animal Ethical Committee of National Taiwan University.

## References

1. Laemmli, U.K. Cleavage of structural proteins during the assembly of the head of bacteriophage T4. *Nature*, **1970**, 227, 680–685.
2. Hu, X.B.; Zhang, H.T.; Yanf S.L.; Gong Y. Cloning and expression of adiponectin and its globular domain, and measurement of the biological activity in vivo. **2003**, 35, 1023–1028.
